# Supplementary material
Source: PubMed Central journal article supplement (PMC2707522)

Fig. S1

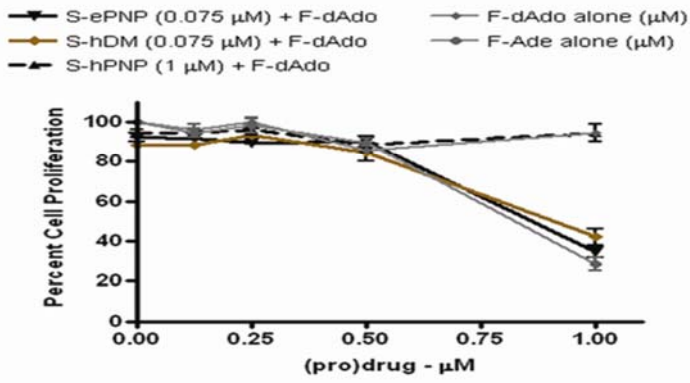

Fig. S2

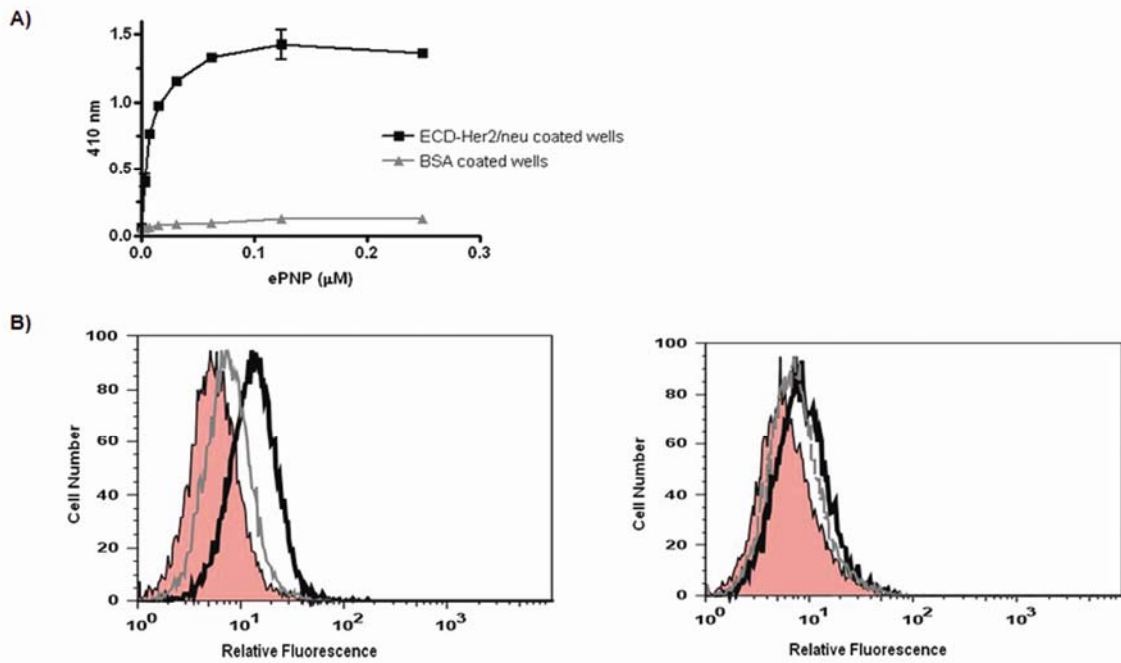

Fig. S3

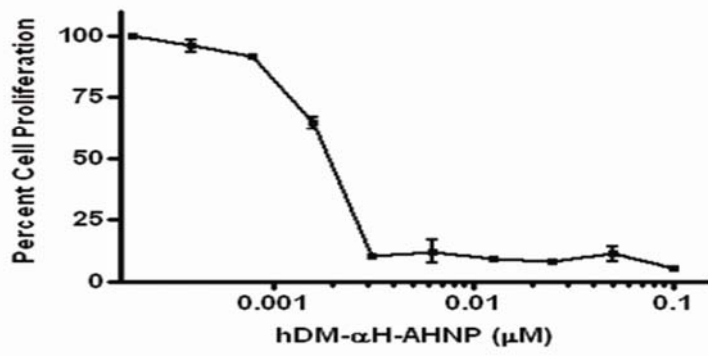

Fig. S4

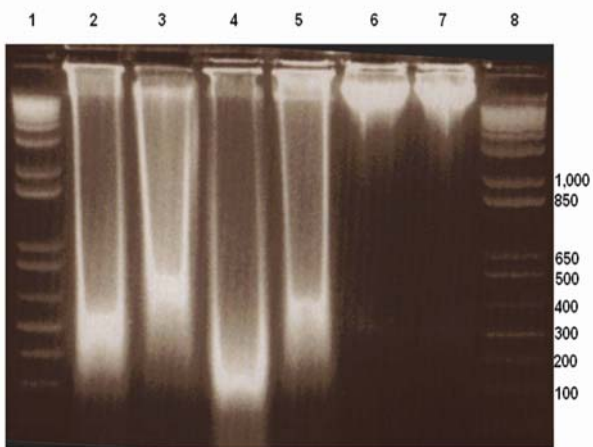

Fig. S5

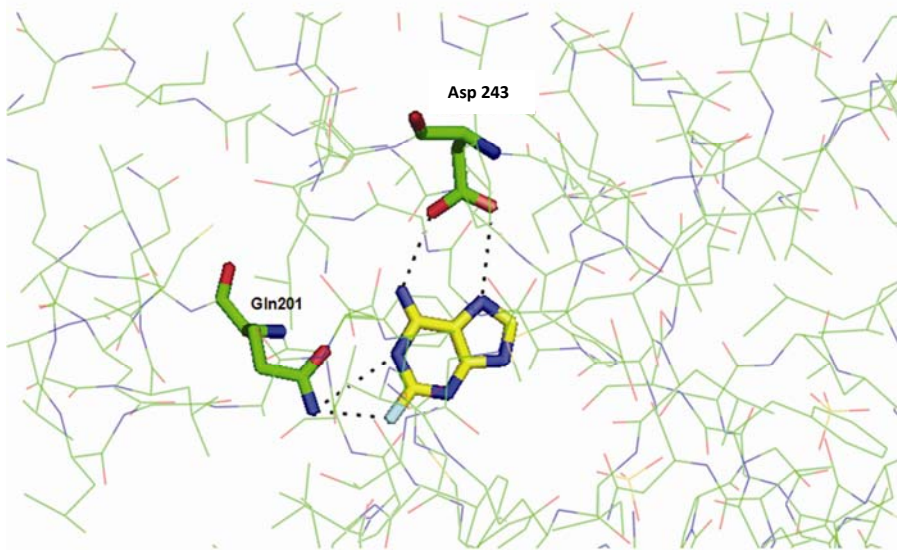

Fig. S6

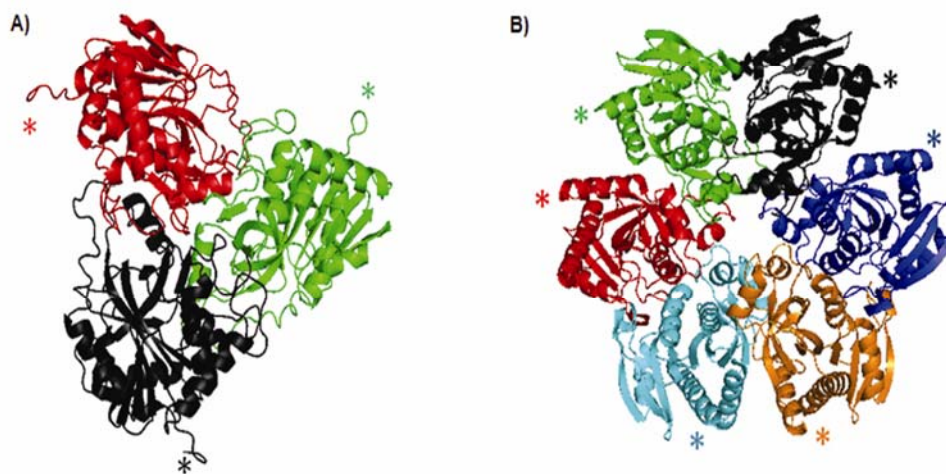

Supplement: NIHMS88439-supplement-01.pdf [file NIHMS88439-supplement-01.pdf]
